# Supplementary material for: A unique pentagonal network structure of the NiS2 monolayer with high stability and a tunable bandgap
Source: Royal Society of Chemistry journal article supplement (doi:10.1039/d0cp00434k), 2020-01-01
Supplement: d0cp00434k1.pdf [file d0cp00434k1.pdf]

## Supporting Information

### (1) The bulk structures of marcasite- and pyrite-type NiS<sub>2</sub>

The marcasite-type bulk NiS<sub>2</sub> [Fig. S1(a)] has an orthorhombic lattice in  $Pn\bar{m}$  symmetry with two Ni atoms and four S atoms, occupying the  $2c$  (0.0, 0.5, 0.0) and  $4g$  (0.1832, 0.1108, 0.0) Wyckoff positions, respectively. Each Ni atom is six-fold coordinated with six S atoms, while each S atom is four-fold coordinated with three Ni atoms and one S atom. The calculated lattice parameters  $a = 4.60$  Å,  $b = 5.57$  Å,  $c = 3.55$  Å, with the bond lengths of  $d_{\text{Ni-S}} = 2.38$  Å and  $d_{\text{S-S}} = 2.09$  Å. We can obtain the P-NiS<sub>2</sub> monolayer by cleaving along the (100) plane.

The pyrite-type bulk NiS<sub>2</sub> [Fig. S1(b)] has a cubic lattice in  $Pa\bar{3}$  symmetry with four Ni atoms and eight S atoms, occupying the  $4b$  (0.5, 0.5, 0.5) and  $8c$  (0.1069, 0.1069, 0.1069) Wyckoff positions, respectively. Each Ni atom is six-fold coordinated with six S atoms, while each S atom is four-fold coordinated with three Ni atoms and one S atom. The calculated lattice parameters  $a = b = c = 5.62$  Å, with the bond lengths of  $d_{\text{Ni-S}} = 2.37$  Å and  $d_{\text{S-S}} = 2.08$  Å. The bulk NiS<sub>2</sub> is generally considered to be pyrite-type structure.<sup>[1-5]</sup> We can obtain the O-NiS<sub>2</sub> monolayer by cleaving along the (001) plane.

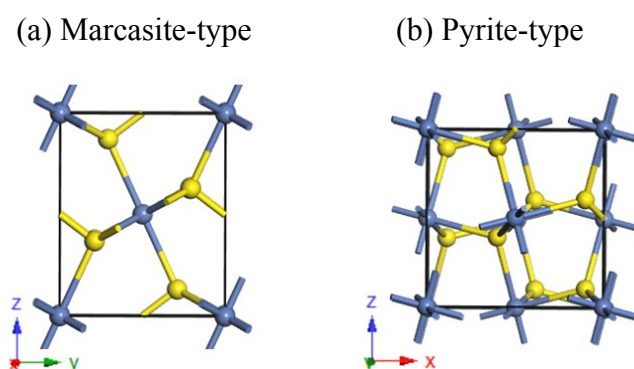

Fig. S1: The bulk structures of (a) marcasite-type NiS<sub>2</sub> and (b) pyrite-type NiS<sub>2</sub>. The unit cell is marked by black lines. The blue and yellow balls represent the Ni and S atoms, respectively.

### (2) The monolayer structures of O-, T- and H-NiS<sub>2</sub> <sup>[6-10]</sup>

The O-NiS<sub>2</sub> monolayer [Fig. S2(a)] has a monoclinic lattice in  $P2_1/c$  symmetry with two Ni atoms and four S atoms, occupying the  $2b$  (0.0, 0.0, 0.5) and  $4e$  (0.1166,

0.3762, 0.4713) Wyckoff positions, respectively. Each Ni atom is four-fold coordinated with four S atoms, while each S atom is three-fold coordinated with two Ni atoms and one S atom, forming an intriguing pentagonal ring network known as the Cairo pentagonal tiling. The calculated lattice parameters  $a = 5.22 \text{ \AA}$ ,  $b = 5.33 \text{ \AA}$ , the buckling height  $h = 0.57 \text{ \AA}$ , with the bond lengths of  $d_{\text{Ni-S}} = 2.17, 2.18 \text{ \AA}$  and  $d_{\text{S-S}} = 2.13 \text{ \AA}$ .

The T-NiS<sub>2</sub> monolayer [Fig. S2(b)] has a trigonal lattice in  $P\bar{3}m1$  symmetry with one Ni atom and two S atoms, occupying the  $1b$  (0.0, 0.0, 0.5) and  $2d$  (0.3333, 0.6667, 0.5583) Wyckoff positions, respectively. Each Ni atom is six-fold coordinated with six S atoms, while each S atom is three-fold coordinated with three Ni atoms. The calculated lattice parameters  $a = b = 3.35 \text{ \AA}$ , the buckling height  $h = 1.17 \text{ \AA}$ , with the bond lengths of  $d_{\text{Ni-S}} = 2.26 \text{ \AA}$  and  $d_{\text{S-S}} = 3.03 \text{ \AA}$ .

The H-NiS<sub>2</sub> monolayer [Fig. S2(c)] has a hexagonal lattice in  $P\bar{6}m2$  symmetry with one Ni atom and two S atoms, occupying the  $1d$  (0.3333, 0.6667, 0.5000) and  $2g$  (0.0000, 0.0000, 0.4474) Wyckoff positions, respectively. Each Ni atom is six-fold coordinated with six S atoms, while each S atom is three-fold coordinated with three Ni atoms. The calculated lattice parameters  $a = b = 3.54 \text{ \AA}$ , the buckling height  $h = 1.05 \text{ \AA}$ , with the bond lengths of  $d_{\text{Ni-S}} = 2.30 \text{ \AA}$  and  $d_{\text{S-S}} = 2.10 \text{ \AA}$ .

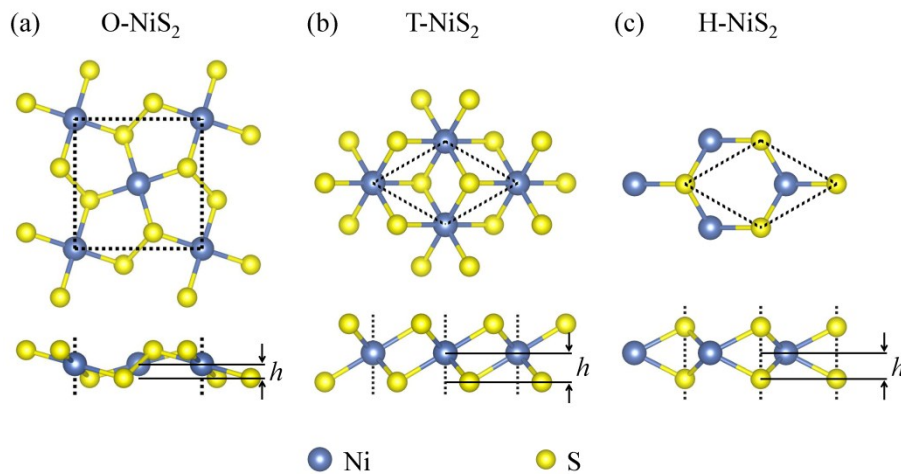

Fig. S2: Top and side views of (a) O-NiS<sub>2</sub> monolayer in  $P21/c$  symmetry, (b) T-NiS<sub>2</sub> monolayer in  $P\bar{3}m1$  symmetry, and (c) H-NiS<sub>2</sub> monolayer in  $P\bar{6}m2$  symmetry. The unit cell is marked by black dashed lines.  $h$  is the buckling height. The blue and yellow

balls represent the Ni and S atoms, respectively.

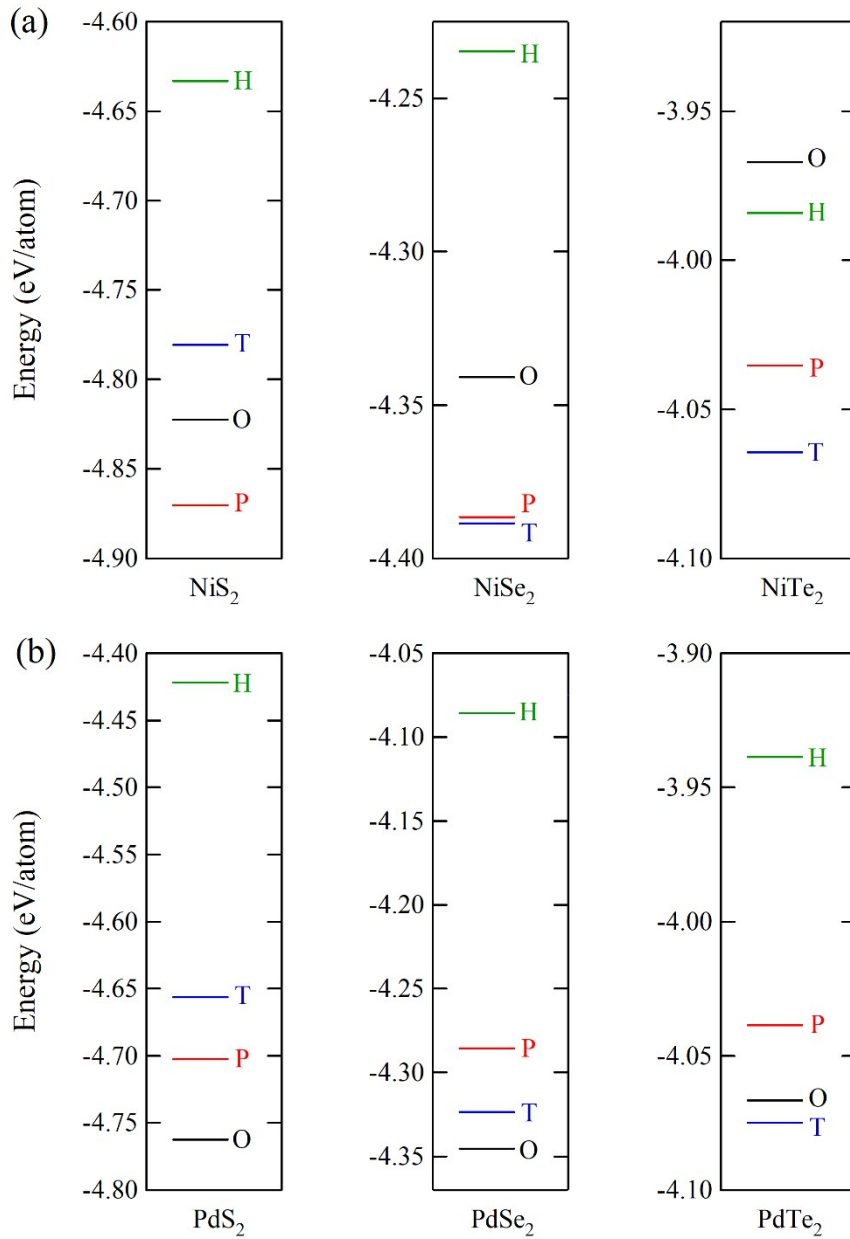

Fig. S3: Energy per atom for (a) NiX<sub>2</sub> and (b) PdX<sub>2</sub> (X = S, Se, Te) monolayers in P-, O-, T- and H-structures.

### (3) Total energy per atom for NiX<sub>2</sub> and PdX<sub>2</sub> (X = S, Se, Te) monolayers

Fig. S3(a) presents the total energy per atom for P-NiX<sub>2</sub> (X = S, Se, Te) pentagonal network structures (red) in comparison with those for O-, T- and H-NiX<sub>2</sub> monolayers. For NiS<sub>2</sub>, the energetic stability sequence is estimated to be: H-NiS<sub>2</sub> < T-NiS<sub>2</sub> < O-NiS<sub>2</sub> < P-NiS<sub>2</sub>; for NiSe<sub>2</sub>, the energetic stability sequence is estimated to be: H-NiSe<sub>2</sub>

$< \text{O-NiSe}_2 < \text{P-NiSe}_2 < \text{T-NiSe}_2$ ; and for  $\text{NiTe}_2$ , the energetic stability sequence is estimated to be:  $\text{O-NiTe}_2 < \text{H-NiTe}_2 < \text{P-NiTe}_2 < \text{T-NiTe}_2$ .

Fig. S3(b) presents the total energy per atom for  $\text{P-PdX}_2$  ( $X = \text{S, Se, Te}$ ) pentagonal network structures (red) in comparison with those for O-, T- and H- $\text{PdX}_2$  monolayers. For  $\text{PdS}_2$ , the energetic stability sequence is estimated to be:  $\text{H-PdS}_2 < \text{T-PdS}_2 < \text{P-PdS}_2 < \text{O-PdS}_2$ ; for  $\text{PdSe}_2$ , the energetic stability sequence is estimated to be:  $\text{H-PdSe}_2 < \text{P-PdSe}_2 < \text{T-PdSe}_2 < \text{O-PdSe}_2$ ; and for  $\text{PdTe}_2$ , the energetic stability sequence is estimated to be:  $\text{H-PdTe}_2 < \text{P-PdTe}_2 < \text{O-PdTe}_2 < \text{T-PdTe}_2$ .

It is found that, for pentagonal network structure, the  $\text{P-NiX}_2$  is always more favourable in energy than the  $\text{O-NiX}_2$ , while the  $\text{O-PdX}_2$  is always more favourable in energy than the  $\text{P-PdX}_2$  is. If we consider all four possible structures, the T-structure becomes more stable in  $\text{NiSe}_2$ ,  $\text{NiTe}_2$ , and  $\text{PdTe}_2$  monolayers. Experimentally, multilayer  $\text{O-PdSe}_2$ ,<sup>[11]</sup>  $\text{T-NiSe}_2$ ,<sup>[12]</sup>  $\text{T-NiTe}_2$ ,<sup>[13]</sup> and  $\text{T-PdTe}_2$ <sup>[14]</sup> have been successfully synthesized, which are in good agreement with our calculated results shown in Fig. S3.

## References

- [1] J. Yin, Y. Li, F. Lv, M. Lu, K. Sun, W. Wang, L. Wang, F. Cheng, Y. Li, P. Xi and S. Guo, *Adv. Mater.*, 2017, **29**, 1704681.
- [2] N. Jiang, Q. Tang, M. Sheng, B. You, D.-E. Jiang and Y. Sun, *Catal. Sci. Technol.*, 2016, **6**, 1077-1084.
- [3] T. Wang, X. Guo, J. Zhang, W. Xiao, P. Xi, S. Peng and D. Gao, *J. Mater. Chem. A*, 2019, **7**, 4971-4976.
- [4] R. L. Kautz, M. S. Dresselhaus, D. Adler and A. Linz, *Phys. Rev. B*, 1972, **6**, 2078-2082.
- [5] C. Schuster, M. Gatti and A. Rubio, *Eur. Phys. J. B*, 2012, **85**, 325.
- [6] W. Xiong, K. Huang and S. Yuan, *J. Mater. Chem. C*, 2019, **7**, 13518-13525.
- [7] H. Yang, Y. Li, Z. Yang, X. Shi, Z. Lin, R. Guo, L. Xu, H. Qu and S. Zhang, *Vacuum*, 2020, **174**, 109176.
- [8] C. Ataca, H. Sahin and S. Ciraci, *J. Phys. Chem. C*, 2012, **116**, 8983-8999.
- [9] P. Miró, M. Ghorbani-Asl and T. Heine, *Angew. Chem. Int. Ed.*, 2014, **53**, 3015-3018.

- [10] J. A. Reyes-Retana and F. Cervantes-Sodi, *Sci. Rep.*, 2016, **6**, 24093.
- [11] A. D. Oyedele, S. Yang, L. Liang, A. A. Puretzky, K. Wang, J. Zhang, P. Yu, P. R. Pudasaini, A. W. Ghosh, Z. Liu, C. M. Rouleau, B. G. Sumpter, M. F. Chisholm, W. Zhou, P. D. Rack, D. B. Geohegan and K. Xiao, *J. Am. Chem. Soc.*, 2017, **139**, 14090-14097.
- [12] Y. Shao, S. Song, X. Wu, J. Qi, H. Lu, C. Liu, S. Zhu, Z. Liu, J. Wang, D. Shi, S. Du, Y. Wang and H.-J. Gao, *Appl. Phys. Lett.*, 2017, **111**, 113107.
- [13] B. Zhao, W. Dang, Y. Liu, B. Li, J. Li, J. Luo, Z. Zhang, R. Wu, H. Ma, G. Sun, Y. Huang, X. D. Duan and X. F. Duan, *J. Am. Chem. Soc.*, 2018, **140**, 14217-14223.
- [14] E. Li, R.-Z. Zhang, H. Li, C. Liu, G. Li, J.-O. Wang, T. Qian, H. Ding, Y.-Y. Zhang, S.-X. Du, X. Lin and H.-J. Gao, *Chin. Phys. B*, 2018, **27**, 086804.
